# Supplementary material
Source: PubMed Central journal article supplement (PMC3252932)
Supplement: 1107524108_pnas.1107524108_SI.pdf [file 1107524108_pnas.1107524108_SI.pdf]

# Supporting Information

Okada et al. 10.1073/pnas.1107524108

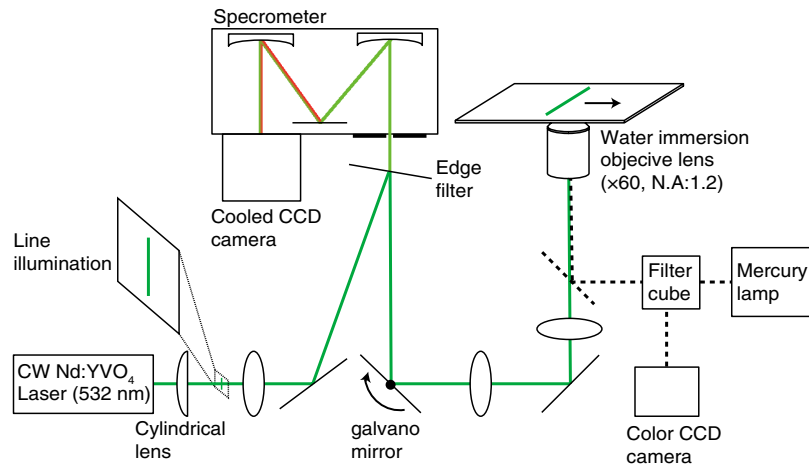

Fig. S1. Optical setup for a slit-scanning Raman microscope.

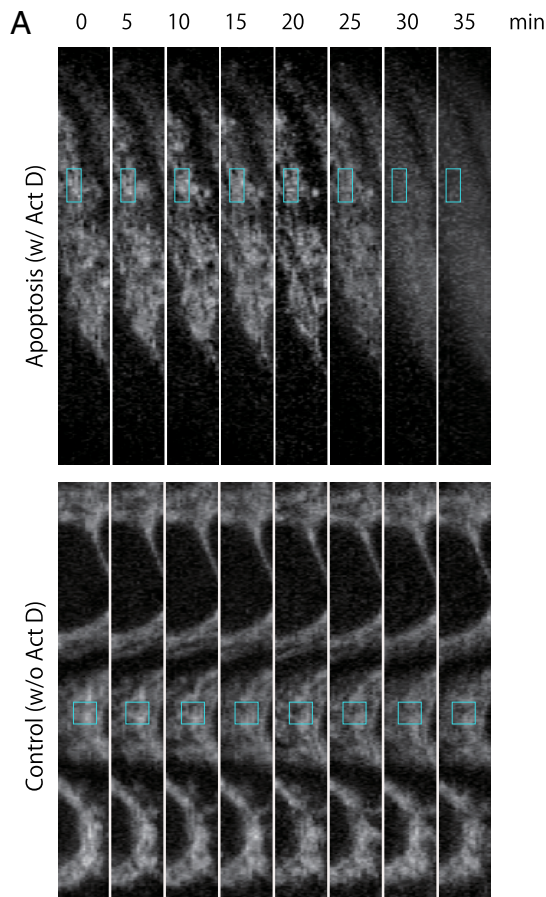

Fig. S2. The time-lapse Raman spectra of HeLa cells incubated with/without Actinomycin D in Fig. 1B were obtained by averaging the spectra from the area framed by white rectangle (180 pixels) in Fig. 1A, respectively.
